# Supplementary material for: Impact of Infections in Patients Receiving Pembrolizumab-Based Therapies for Non-Small Cell Lung Cancer
Source: MDPI journal article supplement (doi:10.3390/cancers15010081), 2022-12-23
Supplement: s1 [file s1]

Supplementary Materials

# Impact of Infections in Patients Receiving Pembrolizumab-Based Therapies for Non-Small Cell Lung Cancer

Ethan A. Burns, Kelly Gee, Ryan B. Kieser, Jiaqiong Xu, Yuqi Zhang, Aubrey Crenshaw, Ibrahim N. Muhsen, Charisma Mylavarapu, Abdullah Esmail, Shivan Shah, Godsfavour Umore, Kai Sun, Carlo Guerrero, Zimu Gong, Kirk Heyne, Monisha Singh, Jun Zhang, Eric H. Bernicker and Maen Abdelrahim

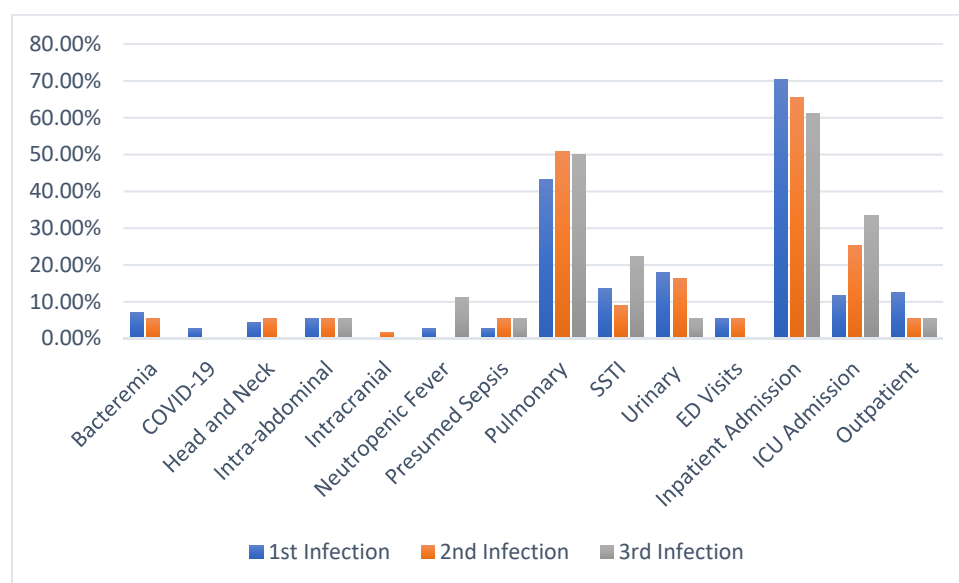

**Figure S1.** Distribution of each infection. SSTI: Skin and soft tissue infection; ED: Emergency Department; ICU: Intensive Care Unit.

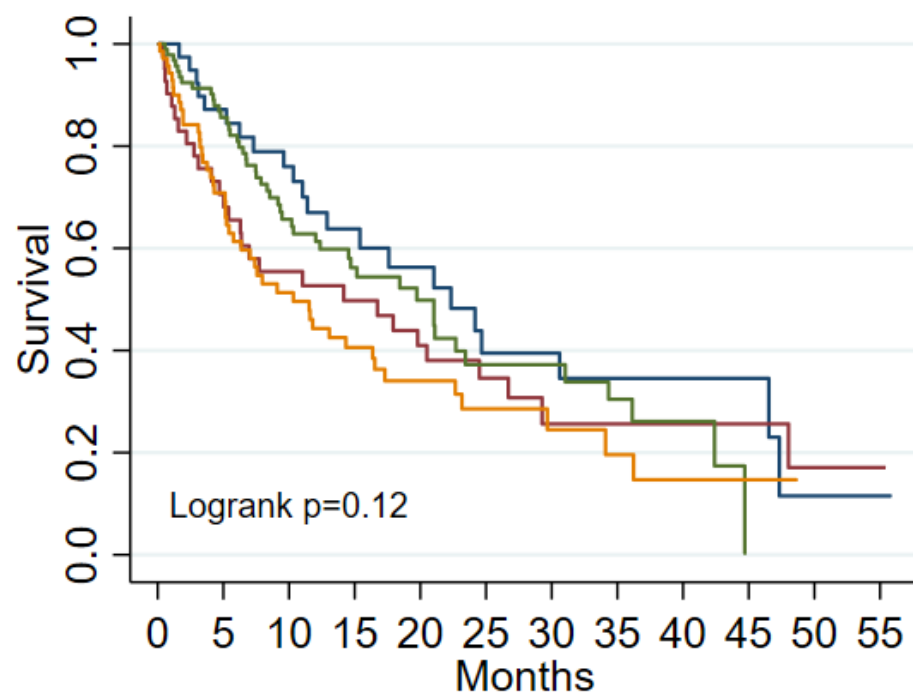

### Number at risk

|                            |    |    |    |    |    |    |    |   |   |   |   |   |
|----------------------------|----|----|----|----|----|----|----|---|---|---|---|---|
| Monotherapy & No Infection | 39 | 32 | 26 | 17 | 14 | 9  | 8  | 6 | 4 | 3 | 1 | 1 |
| Monotherapy & Infection    | 41 | 28 | 21 | 17 | 14 | 9  | 5  | 5 | 5 | 4 | 1 | 1 |
| Multiagent & No Infection  | 93 | 73 | 46 | 31 | 21 | 13 | 12 | 8 | 3 | 0 | 0 | 0 |
| Multiagent & Infection     | 70 | 45 | 30 | 20 | 14 | 9  | 6  | 4 | 3 | 1 | 0 | 0 |

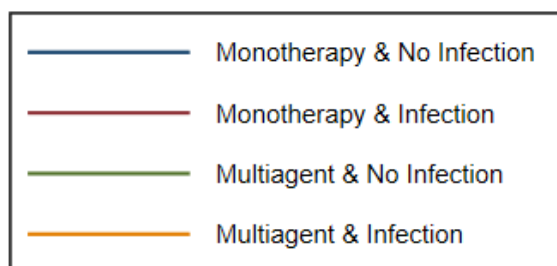

**Figure S2A.** Median overall survival for monotherapy and chemotherapy for infected and noninfected patients.

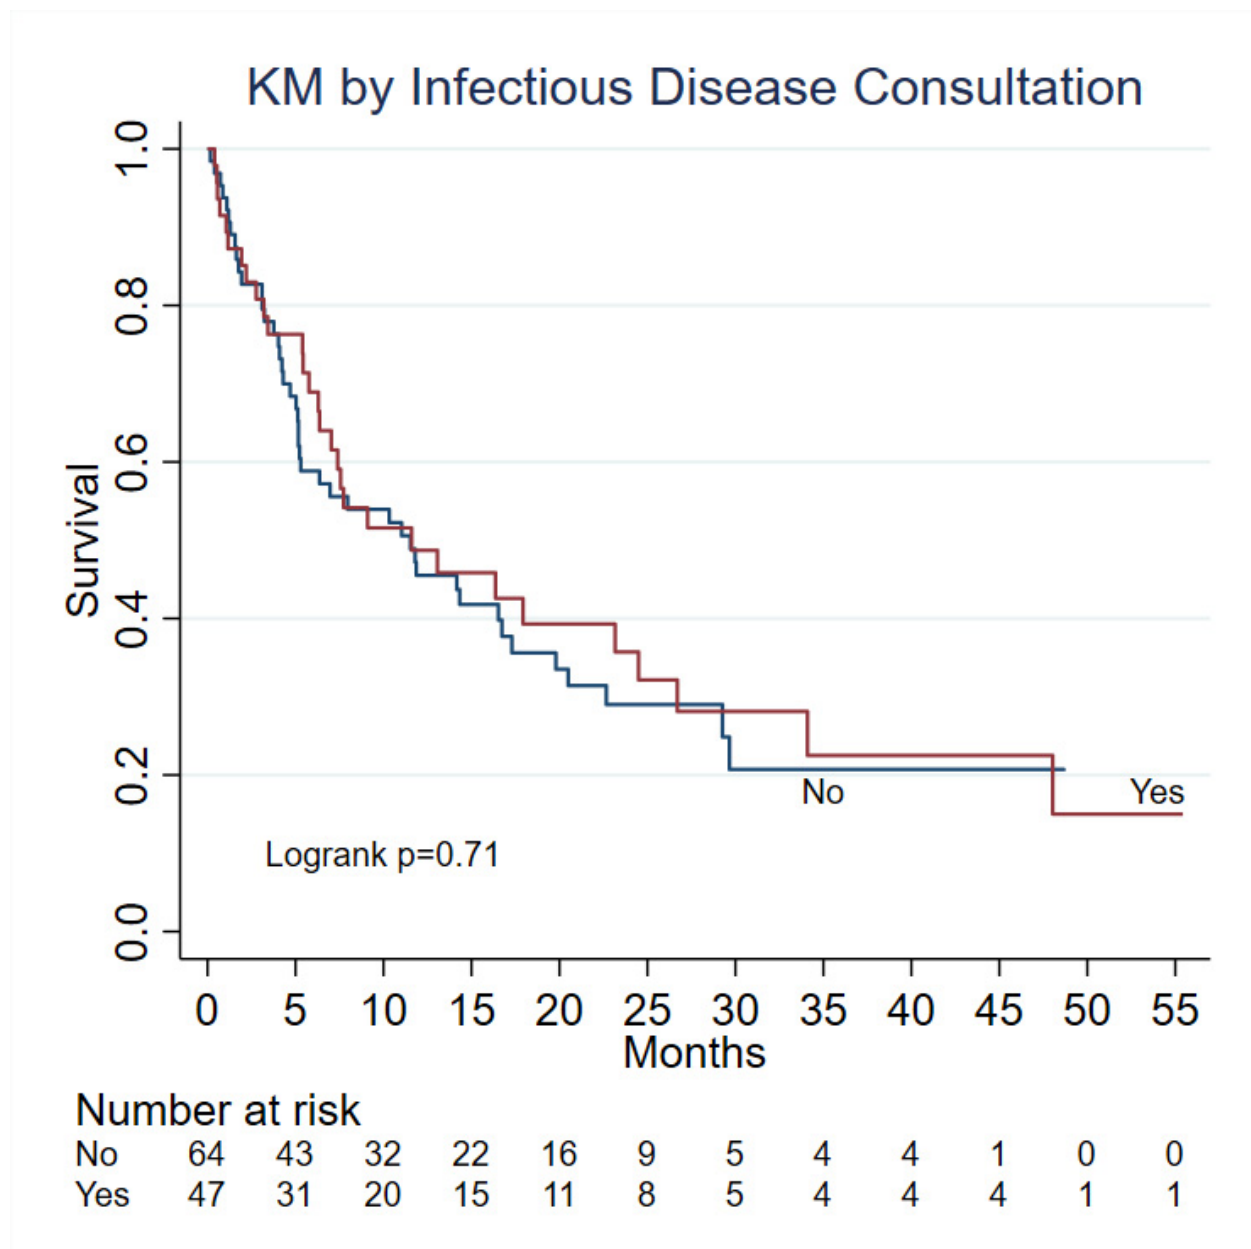

**Figure S2B.** Survival for patients who received infectious disease consultation.

**Table S1.** Distribution of culture positive infections.

| Type of infection     | Pathogen                   | 1st Infection | 2nd Infection | 3rd Infection |
|-----------------------|----------------------------|---------------|---------------|---------------|
| Bacteremia/Fungemia   |                            |               |               |               |
| Total Number of Cases |                            | 8             | 3             | 1             |
|                       | Pathogen Isolated          | 8             | 3             | 1             |
|                       | Corynebacterium species    | 1             | 0             | 0             |
|                       | Escherichia coli           | 1             | 0             | 0             |
|                       | Micrococcus luteus         | 1             | 0             | 0             |
|                       | Proteus mirabilis          | 1             | 0             | 0             |
|                       | Staphylococcus Aureus      | 1             | 1             | 0             |
|                       | Staphylococcus epidermidis | 1             | 0             | 0             |
|                       | Staphylococcus hominis     | 1             | 0             | 0             |
|                       | Bacillus lentis            | 0             | 1             | 0             |

|                            |                                                                     |    |    |   |
|----------------------------|---------------------------------------------------------------------|----|----|---|
|                            | Streptococcus pneumoniae                                            | 1  | 0  | 1 |
|                            | Candida Tropicalis                                                  | 0  | 1  | 0 |
| Pulmonary                  |                                                                     |    |    |   |
| Total Number of Cases      |                                                                     | 49 | 29 | 9 |
|                            | Pathogen Isolated                                                   | 13 | 8  | 3 |
|                            | Coronavirus HKU1                                                    | 2  | 0  | 0 |
|                            | COVID 19                                                            | 3  | 0  | 0 |
|                            | Influenza B                                                         | 1  | 1  | 1 |
|                            | RSV                                                                 | 1  | 0  | 0 |
|                            | Rhinovirus/Enterovirus                                              | 4  | 1  | 1 |
|                            | Parainfluenza-1                                                     | 0  | 1  | 0 |
|                            | Escherichia coli                                                    | 1  | 0  | 0 |
|                            | Escherichia coli, Legionella                                        | 0  | 1  | 0 |
|                            | Sternotrophomonas                                                   | 0  | 1  | 0 |
|                            | Staphylococcus aureus                                               | 0  | 0  | 1 |
|                            | Pseudomonas aeruginosa                                              | 1  | 2  | 0 |
|                            | Aspergillosis                                                       | 0  | 1  | 0 |
| Neutropenic Fever          |                                                                     |    |    |   |
| Total Number of Cases      |                                                                     | 3  | 0  | 2 |
|                            | Pathogen Isolated                                                   | 0  | 0  | 0 |
| Head and Neck              |                                                                     |    |    |   |
| Total Number of Cases      |                                                                     | 5  | 5  | 0 |
|                            | Pathogen Isolated                                                   | 2  | 2  | 0 |
|                            | Candida Esophagitis                                                 | 2  | 2  | 0 |
| Intraabdominal             |                                                                     |    |    |   |
| Total Number of Cases      |                                                                     | 6  | 3  | 1 |
|                            | Pathogen Isolated                                                   | 6  | 1  | 0 |
|                            | Clostridium difficil                                                | 5  | 0  | 1 |
|                            | Enteropathogenic Escherichia coli                                   | 1  | 1  | 0 |
| Soft Tissue Skin Infection |                                                                     |    |    |   |
| Total Number of Cases      |                                                                     | 15 | 5  | 4 |
|                            | Pathogen Isolated                                                   | 6  | 2  | 0 |
|                            | Enterobacter cloacae                                                | 0  | 1  | 0 |
|                            | Enterococcus faecalis, Staphylococcus aureus, Prevotella melanogena | 1  | 0  | 0 |
|                            | Herpes simplex-1                                                    | 3  | 0  | 0 |
|                            | Staphylococcus aureus, Proteus mirabilis                            | 1  | 0  | 0 |
|                            | Varicella zoster reactivation                                       | 1  | 1  | 0 |
| Urinary Tract Infection    |                                                                     |    |    |   |
| Total Number of Cases      |                                                                     | 20 | 10 | 1 |
|                            | Pathogen Isolated                                                   | 18 | 6  | 1 |
|                            | Candida Albicans                                                    | 1  | 0  | 0 |
|                            | Citrobacter koseri                                                  | 1  | 0  | 0 |
|                            | Escherichia coli                                                    | 6  | 4  | 1 |
|                            | Escherichia coli, Klebsiella pneumoniae                             | 1  | 0  | 0 |
|                            | Escherichia coli, Enterococcus faecalis                             | 1  | 0  | 0 |
|                            | Enterobacter cloacae                                                | 1  | 0  | 0 |

|                       |                         |   |   |   |
|-----------------------|-------------------------|---|---|---|
| Presumed Sepsis       | Enterococcus faecalis   | 1 | 1 | 0 |
|                       | Enterococcus faecium    | 1 | 0 | 0 |
|                       | Klebsiella pneumoniae   | 1 | 0 | 0 |
|                       | Proteus mirabilis       | 1 | 1 | 0 |
|                       | Pseudomonas aeruginosa  | 2 | 0 | 0 |
|                       | Streptococcus sanguinis | 1 | 0 | 0 |
| Total Number of Cases |                         | 3 | 2 | 1 |
| Intracranial          | Pathogen Isolated       | 0 | 0 | 0 |
|                       | Pathogen Isolated       | 0 | 1 | 0 |
|                       | Serratia marscenses     | 0 | 1 | 0 |

**Table S2.** Outcome of Infection.

| Outcome                                 | Total (n=111) |
|-----------------------------------------|---------------|
| Treatment Delay                         | 56 (50.4%)    |
| Treatment Discontinuation               | 28 (25.2%)    |
| Progression Documented During Infection | 16 (14.4%)    |
| Infection-Related Death                 | 11 (9.9%)     |
| Anti-Infectives for Infections          |               |
| Antimicrobials                          | 104 (93.7%)   |
| Antiviral                               | 12 (10.8%)    |
| Antifungal                              | 10 (9.0%)     |
| Antimicrobials                          |               |
| Total                                   | 216           |
| Azithromycin                            | 9 (4.2%)      |
| Penicillins                             | 29 (13.4%)    |
| Cephalosporin                           | 64 (29.6%)    |
| Vancomycin                              | 53 (24.5%)    |
| Metronidazole                           | 9 (4.2%)      |
| Fluoroquinolone                         | 23 (10.6%)    |
| Aztreonam                               | 2 (0.9%)      |
| Tetracycline                            | 8 (3.7%)      |
| Linezolid                               | 2 (0.9%)      |
| Carbopenem                              | 11 (5.1%)     |
| Clindamycin                             | 2 (0.9%)      |
| Nitrofurantoin                          | 1 (0.5%)      |
| Tobramycin                              | 1 (0.5%)      |
| Daptomycin                              | 1 (0.5%)      |
| Trimethoprim-Sulfamethaxazole           | 1 (0.5%)      |
| Antiviral                               |               |
| Total                                   | 10            |
| Oseltamivir                             | 3 (30.0%)     |
| Acyclovir                               | 2 (20.0%)     |
| Valacyclovir                            | 2 (20.0%)     |
| Remdesivir                              | 3 (30.0%)     |
| Antifungal                              |               |
| Total                                   | 10            |
| Fluconazole                             | 8 (80.0%)     |
| Voriconazole                            | 1 (10.0%)     |
| Miconazole                              | 1 (10.0%)     |
